# Supplementary material
Source: ML conference proceedings conference paper supplement (https://openaccess.thecvf.com/content/ACCV2020/html/Sarhan_Utilizing_Transfer_Learning_ACCV_2020_paper.html)

This figure shows a comparison between different modes of our model when exposed to images with bright artifacts. We compare the performance with and without transfer learning (TL) and image augmentation (IA).

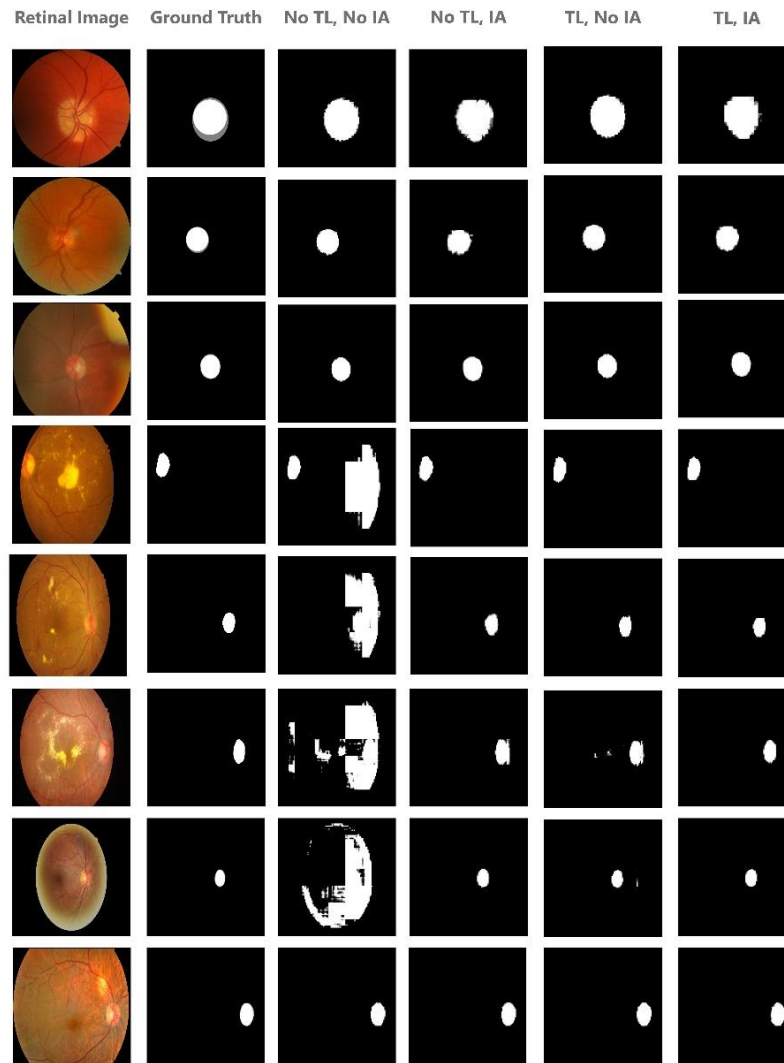

Supplement: Supplementary file 1 [file Sarhan_Utilizing_Transfer_Learning_ACCV_2020_supplemental.pdf]
